# Supplementary material for: A facile fabrication of a hierarchical ZIF-8/MWCNT nanocomposite for the sensitive determination of rutin
Source: Royal Society of Chemistry journal article supplement (doi:10.1039/d1ay01421h), 2021-01-01
Supplement: d1ay01421h1.pdf [file d1ay01421h1.pdf]

## Electronic Supplementary Material

### A facial fabrication of hierarchical ZIF-8/MWCNTs nanocomposite for the sensitive determination of rutin

Danfeng Qin<sup>a,b,†</sup>, Tianhao Li<sup>a,†</sup>, Xuenuan Li<sup>a</sup>, Jun Feng<sup>a,b</sup>, Tingfan Tang<sup>a</sup>, Hao Cheng<sup>a,\*</sup>

a. Guangxi Key Laboratory of Green Processing of Sugar Resources, College of Biological and Chemical Engineering, Guangxi University of Science and Technology, Liuzhou 545006, Guangxi province, P.R. China.

b. School of Medicine Guangxi University of Science and Technology, Liuzhou 545006, Guangxi province, P.R. China.

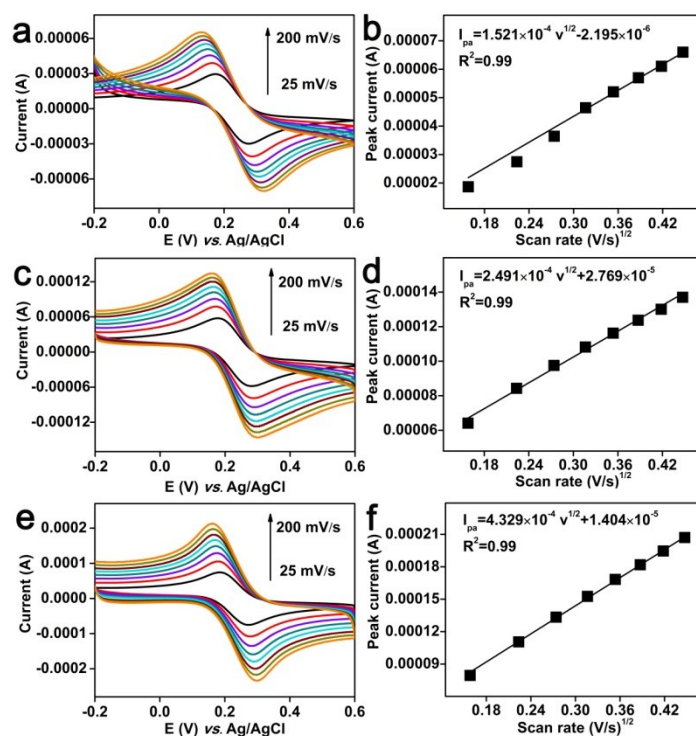

Figure S1 CV of (a) bare GCE, (c) MWCNTs/GCE, (e) ZIF-8/MWCNTs/GCE in 5 mM [Fe(CN)<sub>6</sub>]<sup>3-/4-</sup> containing 0.1 M KCl. ( $v = 25, 50, 100, 125, 150, 175,$  and  $200$  mV/s). The corresponding calibration curves of (b) bare GCE, (d) MWCNTs/GCE, (f) ZIF-8/MWCNTs/GCE, respectively.
